# Supplementary material for: Teacher-Rated Executive Functions, Gender and Relative Age: Independent and Interactive Effects on Observed Fundamental Motor Skills in Kindergarteners
Source: Frontiers journal article supplement (doi:10.3389/fpsyg.2022.848525), 2022-02-22
Supplement: Data_Sheet_1.PDF [file Data_Sheet_1.PDF]

| Criterion        | Criterion description                                                                                                                                                                                                                                                                                   | Category             | Category description                                                                                                                                                                                                                                                                                                                                                                                                                                                                                                                                                                                                                                                                      | Category code |
|------------------|---------------------------------------------------------------------------------------------------------------------------------------------------------------------------------------------------------------------------------------------------------------------------------------------------------|----------------------|-------------------------------------------------------------------------------------------------------------------------------------------------------------------------------------------------------------------------------------------------------------------------------------------------------------------------------------------------------------------------------------------------------------------------------------------------------------------------------------------------------------------------------------------------------------------------------------------------------------------------------------------------------------------------------------------|---------------|
| Motor task       | Activity performed by the participant                                                                                                                                                                                                                                                                   | Hopping with one leg | Activity in which the participant should hop on one leg down a line, stepping on it and without crossing it.                                                                                                                                                                                                                                                                                                                                                                                                                                                                                                                                                                              | Apc           |
|                  |                                                                                                                                                                                                                                                                                                         | Long jump            | Activity in which the participant, situated on a specific point, jumps forward with both feet together, propelling him/herself with his/her arms. The participant should land on his/her feet, not touching the ground with his/her hands.                                                                                                                                                                                                                                                                                                                                                                                                                                                | Sl            |
|                  |                                                                                                                                                                                                                                                                                                         | Throwing a ball      | Activity in which the participant should throw a tennis ball horizontally so that it passes through a hoop that is situated at a distance of 1.5 meters away from them.                                                                                                                                                                                                                                                                                                                                                                                                                                                                                                                   | Lh            |
|                  |                                                                                                                                                                                                                                                                                                         | Catching a ball      | Activity in which the participant should catch a ball that is thrown by an adult from a distance of 1.5 meters.                                                                                                                                                                                                                                                                                                                                                                                                                                                                                                                                                                           | Rp            |
|                  |                                                                                                                                                                                                                                                                                                         | Squatting            | Activity in which the participant, with eyes closed, should remain in a squatting position over the balls of his/her feet, which should be separated by approximately 30 cm, with his/her body bent and arms extended horizontally to the sides (that is, extended in the form of a cross).                                                                                                                                                                                                                                                                                                                                                                                               | C             |
|                  |                                                                                                                                                                                                                                                                                                         | Standing on one leg  | Activity in which the participant, with eyes closed, should remain standing on one leg, on the same point, first standing on one leg and then changing to the other.                                                                                                                                                                                                                                                                                                                                                                                                                                                                                                                      | Ppc           |
|                  |                                                                                                                                                                                                                                                                                                         | Walking heel-to-toe  | Activity in which the participant should walk down a line with his/her heel next to the toes of the other foot (there should be no space left on the ground between the two feet).                                                                                                                                                                                                                                                                                                                                                                                                                                                                                                        | Apt           |
|                  |                                                                                                                                                                                                                                                                                                         | Vertical jumps       | Activity in which the participant, situated on a point that is the center of a square measuring 25 cm per side, and looking forward, should jump up and down ten times in a row, landing on the same point where he/she began.                                                                                                                                                                                                                                                                                                                                                                                                                                                            | Ss            |
| Side of a square | Side of the square on which the participant carrying out the activity is situated. This applies in the following tasks: <i>Hopping with one leg</i> and <i>Walking heel-to-toe</i> .                                                                                                                    | Side 1               | The participant is carrying out the activity on side 1 of the square.                                                                                                                                                                                                                                                                                                                                                                                                                                                                                                                                                                                                                     | L1            |
|                  |                                                                                                                                                                                                                                                                                                         | Side 2               | The participant is carrying out the activity on side 2 of the square.                                                                                                                                                                                                                                                                                                                                                                                                                                                                                                                                                                                                                     | L2            |
|                  |                                                                                                                                                                                                                                                                                                         | Side 3               | The participant is carrying out the activity on side 3 of the square.                                                                                                                                                                                                                                                                                                                                                                                                                                                                                                                                                                                                                     | L3            |
|                  |                                                                                                                                                                                                                                                                                                         | Side 4               | The participant is carrying out the activity on side 4 of the square.                                                                                                                                                                                                                                                                                                                                                                                                                                                                                                                                                                                                                     | L4            |
| Trajectory       | Route or means adopted by the participant's movement when carrying out the activity; that is, the line described by the participant when he/she moves through the space when carrying out the activity. It applies to the following tasks: <i>Hopping with one leg</i> and <i>Walking heel-to-toe</i> . | Rectilinear          | The participant's movement adopts a straight line. Specifically, this implies that when landing from the jumps (if carrying out the <i>Hopping with one leg</i> task) or in his/her steps (if carrying out the <i>Walking heel-to-toe</i> task), the participant steps on the central line (blue) with the entire foot or part of it.                                                                                                                                                                                                                                                                                                                                                     | TR            |
|                  |                                                                                                                                                                                                                                                                                                         | Oscillating          | The participant's movement is fluctuating, so that in at least one of the landings from their jumps (if carrying out the <i>Hopping with one leg</i> task) or in one of their steps (if carrying out the <i>Walking heel-to-toe</i> task), the participant does not cross the central line (blue) but instead, steps either to the right (space marked out by the blue stripe and the red one) or to the left (space marked by the blue stripe and green one). That is, in at least one of the landings from their jumps, or in one of their steps, the participant does not step on the central blue line, but on the space that is marked out by the two lateral lines (red and green). | TO            |
|                  |                                                                                                                                                                                                                                                                                                         | Erratic              | The participant's movement is incorrect, so that, in at least one of the landings from their jumps (if carrying out the <i>Hopping with one leg</i> task) or in one of their steps (if carrying out the <i>Walking heel-to-toe</i> task), the participant does not step on the central line (blue) or within the space marked out by the two lateral lines (red and green). He/she rather, steps outside this space. That is, the participant steps either very far to their right (beyond the lateral red line) or very far to their left (beyond the lateral green line).                                                                                                               | TE            |
| Cadence          | Regularity of the series of movements carried out by the participant. It applies in the following tasks: <i>Hopping with one leg</i> and <i>Walking heel-to-toe</i> .                                                                                                                                   | Rhythmic             | The movement is carried out at a constant speed, without interruptions, stops or changes in speed.                                                                                                                                                                                                                                                                                                                                                                                                                                                                                                                                                                                        | CR            |
|                  |                                                                                                                                                                                                                                                                                                         | Arrhythmic           | The movement is carried out at a varying speed, with interruptions, stops and/or changes in speed.                                                                                                                                                                                                                                                                                                                                                                                                                                                                                                                                                                                        | CA            |
| Extremity        | Upper or lower limb (depending on the task at hand) with which the participant carries out the movement. It applies to the following tasks: <i>Hopping with one leg</i> ,                                                                                                                               | Right                | The (upper or lower) right limb is used by the participant to carry out the movement.                                                                                                                                                                                                                                                                                                                                                                                                                                                                                                                                                                                                     | ED            |
|                  |                                                                                                                                                                                                                                                                                                         | Left                 | The (upper or lower) left limb is used by the participant to carry out the movement.                                                                                                                                                                                                                                                                                                                                                                                                                                                                                                                                                                                                      | EIz           |

|                        |                                                                                                                                                                                                                                                                                                                                       |                                           |                                                                                                                                                                                                            |        |
|------------------------|---------------------------------------------------------------------------------------------------------------------------------------------------------------------------------------------------------------------------------------------------------------------------------------------------------------------------------------|-------------------------------------------|------------------------------------------------------------------------------------------------------------------------------------------------------------------------------------------------------------|--------|
|                        | <i>Throwing a ball and Standing on one leg.</i>                                                                                                                                                                                                                                                                                       |                                           |                                                                                                                                                                                                            |        |
| Arm position           | Posture in which the arms are positioned while the participant performs the action. It applies to the following tasks: <i>Hopping with one leg</i> , <i>Squatting</i> , <i>Long jump</i> (to each of the jump phases), and <i>Throwing a ball</i> .                                                                                   | Backwards                                 | The arms are placed behind the participant's shoulders while he/she performs the action (which may be a throw from the back to the front or another action with the arm).                                  | PbA    |
|                        |                                                                                                                                                                                                                                                                                                                                       | Forwards                                  | The arms are placed in front of the participant's shoulders while he/she performs the action, without having been, at any time, behind them during the course of the action.                               | PbD    |
|                        |                                                                                                                                                                                                                                                                                                                                       | Across the body                           | The arms are extended outwards, following the directionality of the participant's body while he/she performs the action.                                                                                   | PbC    |
|                        |                                                                                                                                                                                                                                                                                                                                       | In the form of a cross with arms extended | Upon performing the activity, the participant keeps his/her arms extended horizontally in the form of a cross.                                                                                             | PbCzE  |
|                        |                                                                                                                                                                                                                                                                                                                                       | In the form of a cross with arms bent     | Upon performing the activity, the participant keeps his/her arms horizontally bent in the form of a cross.                                                                                                 | PbCzFl |
|                        |                                                                                                                                                                                                                                                                                                                                       | Others                                    | Upon performing the activity, the participant keeps his/her arms in a position that differs from those mentioned above.                                                                                    | PbO    |
| Jump phase             | One of the three phases that may be distinguished in the jump, that is, one of the three moments that can be distinguished in the movement produced by the action of one or both legs, through which the participant's body leaves the ground as a support surface, later returning to it. This applies to the <i>Long jump</i> task. | Impulse                                   | Jump phase where the trajectory to be followed by the participant is determined. It requires a bending, followed by a quick extension of the lower trunk.                                                  | FsIm   |
|                        |                                                                                                                                                                                                                                                                                                                                       | Flight                                    | Jump phase in which the participant loses contact with the surface. It implies a horizontal displacement across the air.                                                                                   | FsV    |
|                        |                                                                                                                                                                                                                                                                                                                                       | Landing                                   | Jump phase in which the participant comes into contact with the ground once again. In this phase, the accumulated energy is absorbed or transformed.                                                       | FsR    |
| Leg position           | Posture adopted by the participant's legs when carrying out the following tasks: <i>Long jump</i> (in each of the phases of the jump) and <i>Catching a ball</i> .                                                                                                                                                                    | Knees bent                                | While performing the activity, the participant keeps his/her knees bent, so that his/her abductor muscles and calves are close together.                                                                   | PRfl   |
|                        |                                                                                                                                                                                                                                                                                                                                       | Knees not bent                            | While performing the activity, the participant keeps his/her knees extended, without bending them.                                                                                                         | PRsfl  |
| Distance to the ground | Space between the ground and the participant's feet. This applies to the following tasks: <i>Long jump</i> , <i>Squatting</i> and <i>Vertical jumps</i> . In the <i>Long jump</i> task, it is applicable to each of the jump phases.                                                                                                  | Feet on the floor                         | The balls of the participant's feet are kept fully on the ground. (In the <i>Vertical jumps</i> task, this only applies to the landing of the jump phase).                                                 | DsPs   |
|                        |                                                                                                                                                                                                                                                                                                                                       | Heels lifted                              | Only the balls of the participant's feet touch the ground, with their heels being lifted up from the ground.                                                                                               | DsTe   |
|                        |                                                                                                                                                                                                                                                                                                                                       | Feet in the air                           | The participant's feet are in the air, not touching the ground with any part of them. This category is not applicable to the <i>Squatting</i> task.                                                        | DsPa   |
| Centimeters            | Space, distance measured in cm from the point where the propelling takes place, as done by the participant when jumping, to the point where the landing of said jump occurs. This only applies to the <i>Long jump</i> task.                                                                                                          | Quartile 1 distance                       | The participant has jumped a distance that is situated between 0 and 25% from the lowest distances jumped by the study participants.                                                                       | C1     |
|                        |                                                                                                                                                                                                                                                                                                                                       | Quartile 2 distance                       | The participant has jumped a distance that is situated between 26% and 50% from the lowest distances jumped by the study participants.                                                                     | C2     |
|                        |                                                                                                                                                                                                                                                                                                                                       | Quartile 3 distance                       | The participant has jumped a distance that is situated between 51% and 75% from the greatest distances jumped by the study participants.                                                                   | C3     |
|                        |                                                                                                                                                                                                                                                                                                                                       | Quartile 4 distance                       | The participant has jumped a distance that is situated between 76% and 100% from the greatest distances jumped by the study participants.                                                                  | C4     |
| Base of support        | Space, distance between the participant's feet. This applies to the following tasks: <i>Long jump</i> (to each of the jump phases), <i>Vertical jumps</i> (to the landing of the jump), <i>Throwing a ball</i> .                                                                                                                      | Feet together                             | The participant's feet touch one another.                                                                                                                                                                  | BsPj   |
|                        |                                                                                                                                                                                                                                                                                                                                       | Feet separated                            | The participant's feet are separated by a distance of less than 15 cm.                                                                                                                                     | BsPs   |
|                        |                                                                                                                                                                                                                                                                                                                                       | Feet widely separated                     | The participant's feet are separated by a distance of more than 15 cm.                                                                                                                                     | BsPms  |
| Type of landing        | Means in which the landing of the jump takes place in the <i>Long jump</i> task. This only applies to this task.                                                                                                                                                                                                                      | Without bouncing                          | During the landing phase of the jump in the <i>Long jump</i> task, the participant keeps his/her feet immobile with respect to the first position in which he/she landed. It is considered a correct jump. | TcSr   |
|                        |                                                                                                                                                                                                                                                                                                                                       | With a bounce                             | During the landing phase of the jump in the <i>Long jump</i> task, the participant moves his/her feet with respect to the first position in which he/she landed. It is considered an incorrect jump.       | TcCr   |
| Precision of the       | In the <i>Vertical jumps</i> task, adjustment between the                                                                                                                                                                                                                                                                             | The 2 feet within the                     | During the landing phase of the jump, the participant lands with the 2 feet within the square, without                                                                                                     | Ps2Dt  |

|                          |                                                                                                                                                                                                                                                                        |                                                 |                                                                                                                                                                                                                                                                                                                                                                     |       |
|--------------------------|------------------------------------------------------------------------------------------------------------------------------------------------------------------------------------------------------------------------------------------------------------------------|-------------------------------------------------|---------------------------------------------------------------------------------------------------------------------------------------------------------------------------------------------------------------------------------------------------------------------------------------------------------------------------------------------------------------------|-------|
| jump                     | position of the feet in the jump landing phase and the square that is painted on the ground (participant location at the start of the task). That is, this category assesses if the participant, during each jump, lands in the same area where he/she began the task. | square                                          | stepping on any of its lines.                                                                                                                                                                                                                                                                                                                                       |       |
|                          |                                                                                                                                                                                                                                                                        | At least one foot steps on a line of the square | During the landing phase of the jump, the participant lands stepping on at least one of the lines of the square.                                                                                                                                                                                                                                                    | Ps1Dt |
| Trunk position           | Position adopted by the torso. It applies to the following tasks: <i>Squatting</i> , <i>Throwing a ball</i> and <i>Catching a ball</i> .                                                                                                                               | Outside of the square                           | During the landing phase of the jump, the participant lands with at least one foot completely outside of the square.                                                                                                                                                                                                                                                | PsF   |
|                          |                                                                                                                                                                                                                                                                        | Upright                                         | The participant's torso is positioned vertically with respect to the ground, that is, their torso is at a 90° angle to the ground                                                                                                                                                                                                                                   | PtE   |
| Time                     | Seconds in which the participant carries out the activity. It applies to the following tasks: <i>Squatting</i> and <i>Standing on one leg</i> .                                                                                                                        | Inclined                                        | The participant's torso is not vertical with respect to the ground, that is, the participant's torso forms an acute or obtuse angle with the ground.                                                                                                                                                                                                                | PtI   |
|                          |                                                                                                                                                                                                                                                                        | Quartile 1 time                                 | The time that the participant spends performing the activity falls within quartile 1 of the times used by all of the participants.                                                                                                                                                                                                                                  | T1    |
|                          |                                                                                                                                                                                                                                                                        | Quartile 2 time                                 | The time that the participant spends performing the activity falls within quartile 2 of the times used by all of the participants.                                                                                                                                                                                                                                  | T2    |
|                          |                                                                                                                                                                                                                                                                        | Quartile 3 time                                 | The time that the participant spends performing the activity falls within quartile 3 of the times used by all of the participants.                                                                                                                                                                                                                                  | T3    |
| Direction of lifted leg  | Position of the leg that is not standing on the ground. This only applies to the <i>Standing on one leg</i> task.                                                                                                                                                      | Quartile 4 time                                 | The time that the participant spends performing the activity falls within quartile 4 of the times used by all of the participants.                                                                                                                                                                                                                                  | T4    |
|                          |                                                                                                                                                                                                                                                                        | Backwards                                       | The leg that is in the air is positioned behind the shoulders (regardless of the angle formed by the bending of the knee).                                                                                                                                                                                                                                          | DplA  |
|                          |                                                                                                                                                                                                                                                                        | Laterally                                       | The participant lifts the leg in the air to one side or another (right or left), in the direction of the shoulder (regardless of the angle formed by the bending of the knee).                                                                                                                                                                                      | DplL  |
| Angle of the lifted leg  | Angle of the leg that is not standing on the ground. This only applies to the <i>Standing on one leg</i> task.                                                                                                                                                         | Other                                           | The participant puts the lifted leg in any position other than the previous ones.                                                                                                                                                                                                                                                                                   | DpñO  |
|                          |                                                                                                                                                                                                                                                                        | Acute angle                                     | The leg that is not standing on the ground is bent at an angle of less than 90°.                                                                                                                                                                                                                                                                                    | AplA  |
|                          |                                                                                                                                                                                                                                                                        | Right angle                                     | The leg that is not standing on the ground is bent at an angle of 90°.                                                                                                                                                                                                                                                                                              | AplR  |
| Way of catching the ball | Way in which the participant catches the ball that has been thrown, using or not using his/her body to help. This only applies to the <i>Catching a ball</i> task.                                                                                                     | Obtuse angle                                    | The leg that is not standing on the ground is bent at an angle of over 90°.                                                                                                                                                                                                                                                                                         | AplO  |
|                          |                                                                                                                                                                                                                                                                        | With both hands                                 | The participant catches the ball with both arms and hands held forward and separated from his/her body, holding it between his/her hands.                                                                                                                                                                                                                           | Rp2m  |
|                          |                                                                                                                                                                                                                                                                        | Supporting on body                              | The participant uses his/her body to catch the ball, supporting the ball with their body.                                                                                                                                                                                                                                                                           | RAac  |
| Hand position            | Posture adopted by the participant's hands when catching the ball. This only applies to the <i>Catching a ball</i> task.                                                                                                                                               | Not catching                                    | The participant does not catch the ball so that it falls to the ground, even if it was previously touched with the hands or another body part, or even when it was previously caught for a brief period of time. (That is, this category is coded regardless of whether the participant momentarily trapped the ball but it immediately fell out of his/her hands). | RpNr  |
|                          |                                                                                                                                                                                                                                                                        | Together                                        | The participant catches the ball with both hands touching each other, with their palms facing upward.                                                                                                                                                                                                                                                               | PminJ |
| Height of the catch      | Vertical distance at which the ball is recovered with respect to the ground. This only applies to the <i>Catching a ball</i> activity.                                                                                                                                 | Separate                                        | The participant catches the ball with his/her hands separated, situated one on each side of the ball.                                                                                                                                                                                                                                                               | PmS   |
|                          |                                                                                                                                                                                                                                                                        | Chest                                           | The participant catches the ball at chest height.                                                                                                                                                                                                                                                                                                                   | ArP   |
|                          |                                                                                                                                                                                                                                                                        | Neck head                                       | The participant catches the ball at face or neck height.                                                                                                                                                                                                                                                                                                            | ArCc  |
|                          |                                                                                                                                                                                                                                                                        | Abdomen                                         | The participant catches the ball at abdomen height.                                                                                                                                                                                                                                                                                                                 | ArAb  |
|                          |                                                                                                                                                                                                                                                                        | Thighs                                          | The participant catches the ball at thighs height.                                                                                                                                                                                                                                                                                                                  | ArM   |
|                          |                                                                                                                                                                                                                                                                        | Knee                                            | The participant catches the ball at knees height.                                                                                                                                                                                                                                                                                                                   | ArRd  |
| Passing through          | It indicates whether or not the ball passes through the hoop. This applies to the <i>Throwing a ball</i> task.                                                                                                                                                         | Under the knee                                  | The participant catches the ball when it is below his/her knees.                                                                                                                                                                                                                                                                                                    | ArDrd |
|                          |                                                                                                                                                                                                                                                                        | Transfer                                        | The ball passes through the hoop.                                                                                                                                                                                                                                                                                                                                   | AtEc  |
|                          |                                                                                                                                                                                                                                                                        | Touch                                           | The ball touches the hoop but does not pass through it.                                                                                                                                                                                                                                                                                                             | AtTn  |
|                          |                                                                                                                                                                                                                                                                        | Diverted                                        | The ball is diverted and does not pass through or touch the hoop.                                                                                                                                                                                                                                                                                                   | AtN   |
